# Supplementary material
Source: HighWire-hosted journal article supplement (https://jnm.snmjournals.org/highwire/filestream/94867/field_highwire_adjunct_files/0/168393_Supplemental_Data.pdf)
Supplement: 168393_Supplemental_Data.pdf [file 168393_Supplemental_Data.pdf]

**Supplemental Table 1: <sup>68</sup>Ga-PSMA Uptake in Normal Organs**

| Organ                       | SUV <sub>max</sub>         |                               | SUV <sub>mean</sub>        |                              |
|-----------------------------|----------------------------|-------------------------------|----------------------------|------------------------------|
|                             | <sup>68</sup> Ga-PSMA      | <sup>68</sup> Ga-RM2          | <sup>68</sup> Ga-PSMA      | <sup>68</sup> Ga-RM2         |
| Brain cortex (frontal lobe) | 0.05 ± 0.02 (0.02–0.09)    | 0.09 ± 0.04 (0.04–0.13)       | 0.02 ± 0.01 (0.01–0.04)    | 0.02 ± 0.02 (0.01–0.05)      |
| Cerebrum                    | 0.17 ± 0.05 (0.09–0.28)    | 0.08 ± 0.05 (0.03–0.15)       | 0.07 ± 0.03 (0.03–0.14)    | 0.03 ± 0.02 (0.01–0.06)      |
| Lacrimal gland              | 9.29 ± 3.29 (4.56–14.91)   | —                             | 5.24 ± 2.33 (2.45–8.79)    | —                            |
| Parotid gland               | 14.16 ± 2.55 (9.92–19.06)  | 1.02 ± 0.23 (0.72–1.33)       | 11.79 ± 2.56 (7.15–16.11)  | 0.62 ± 0.09 (0.47–0.74)      |
| Mandibular gland            | 16.79 ± 3.25 (12.29–22.67) | —                             | 13.51 ± 2.91 (9.87–18.11)  | —                            |
| Submandibular gland         | 5.02 ± 2.44 (1.94–10.56)   | 1.30 ± 0.44 (0.51–1.73)       | 3.32 ± 1.56 (1.53–7.08)    | 0.81 ± 0.31 (0.29–1.24)      |
| Thyroid                     | 1.24 ± 0.34 (0.76–1.91)    | 1.33 ± 0.32 (0.84–1.68)       | 0.87 ± 0.27 (0.44–1.27)    | 0.79 ± 0.25 (0.41–1.11)      |
| Ascending aorta*            | 1.47 ± 0.37 (0.72–2.03)    | 2.44 ± 0.76 (1.78–3.96)       | 0.95 ± 0.27 (0.47–1.38)    | 1.43 ± 0.62 (0.96–2.72)      |
| Lung                        | 0.64 ± 0.20 (0.42–1.05)    | 0.52 ± 0.17 (0.32–0.78)       | 0.43 ± 0.09 (0.33–0.61)    | 0.25 ± 0.08 (0.13–0.35)      |
| Liver                       | 6.04 ± 1.33 (4.06–8.96)    | 2.06 ± 0.54 (1.06–2.54)       | 4.10 ± 0.78 (3.16–5.73)    | 0.87 ± 0.23 (0.50–1.23)      |
| Spleen                      | 7.99 ± 3.26 (2.59–12.27)   | 1.84 ± 0.41 (1.25–2.58)       | 6.36 ± 2.69 (2.00–10.47)   | 1.00 ± 0.39 (0.69–1.81)      |
| Pancreas                    | 2.45 ± 0.38 (1.61–3.04)    | 48.29 ± 8.64 (39.15–64.76)    | 1.73 ± 0.32 (1.01–2.22)    | 33.09 ± 12.99 (13.82–56.88)  |
| Esophagus                   | —                          | 4.68 ± 1.40 (2.94–6.45)       | —                          | 2.52 ± 1.08 (1.37–4.47)      |
| Stomach                     | —                          | 2.43 ± 0.84 (1.30–3.69)       | —                          | 1.27 ± 0.52 (0.61–1.89)      |
| Small intestine             | 14.60 ± 4.60 (8.24–23.36)  | 2.40 ± 0.65 (1.74–3.28)       | 11.00 ± 3.88 (5.62–18.46)  | 1.39 ± 0.51 (0.69–2.25)      |
| Colon                       | 1.60 ± 0.67 (0.82–3.23)    | 2.11 ± 0.83 (1.35–3.75)       | 1.07 ± 0.45 (0.56–2.01)    | 1.07 ± 0.63 (0.54–2.33)      |
| Kidney                      | 35.11 ± 9.91 (14.36–46.21) | 10.88 ± 6.43 (4.18–20.35)     | 25.83 ± 7.48 (12.02–36.00) | 3.86 ± 1.54 (1.95–6.38)      |
| Bladder                     | 35.04 ± 21.71 (9.62–78.52) | 113.94 ± 69.95 (32.64–220.73) | 26.52 ± 17.36 (7.78–67.89) | 78.89 ± 52.10 (29.84–150.32) |
| Cervical vertebrae          | 0.92 ± 0.37 (0.50–1.75)    | 0.74 ± 0.20 (0.45–0.97)       | 0.50 ± 0.14 (0.32–0.81)    | 0.32 ± 0.11 (0.16–0.52)      |
| Thoracic vertebrae          | 0.99 ± 0.24 (0.63–1.36)    | 0.85 ± 0.31 (0.40–1.24)       | 0.60 ± 0.15 (0.38–0.85)    | 0.35 ± 0.17 (0.14–0.63)      |
| Lumbar vertebrae            | 1.17 ± 0.35 (0.76–1.87)    | 0.87 ± 0.14 (0.63–1.07)       | 0.80 ± 0.30 (0.51–1.55)    | 0.29 ± 0.08 (0.20–0.39)      |
| Sacrum                      | 0.84 ± 0.28 (0.49–1.23)    | 0.74 ± 0.40 (0.44–1.57)       | 0.48 ± 0.19 (0.21–0.83)    | 0.23 ± 0.13 (0.14–0.49)      |
| Humerus                     | 0.36 ± 0.11 (0.20–0.56)    | 0.57 ± 0.18 (0.30–0.85)       | 0.23 ± 0.06 (0.13–0.27)    | 0.31 ± 0.11 (0.15–0.48)      |
| Femur                       | 0.41 ± 0.19 (0.18–0.75)    | 0.31 ± 0.09 (0.18–0.40)       | 0.27 ± 0.14 (0.12–0.48)    | 0.13 ± 0.06 (0.07–0.22)      |
| Gluteal fat                 | 0.35 ± 0.14 (0.15–0.54)    | 0.66 ± 0.17 (0.39–0.95)       | 0.21 ± 0.07 (0.13–0.36)    | 0.37 ± 0.11 (0.16–0.52)      |
| Gluteal muscle              | 0.46 ± 0.17 (0.22–0.75)    | 0.86 ± 0.46 (0.45–1.65)       | 0.28 ± 0.12 (0.14–0.54)    | 0.41 ± 0.23 (0.15–0.86)      |

\*Blood pool.

Data are mean ± SD, followed by range in parentheses.

<sup>68</sup>Ga-Bombesin

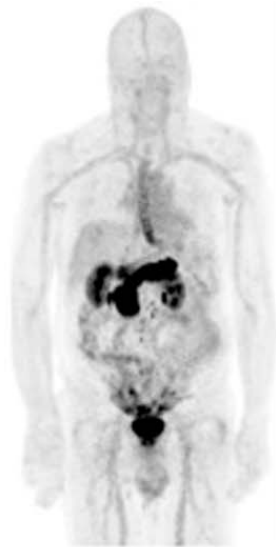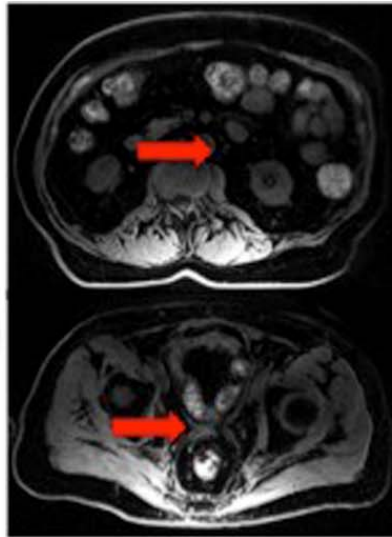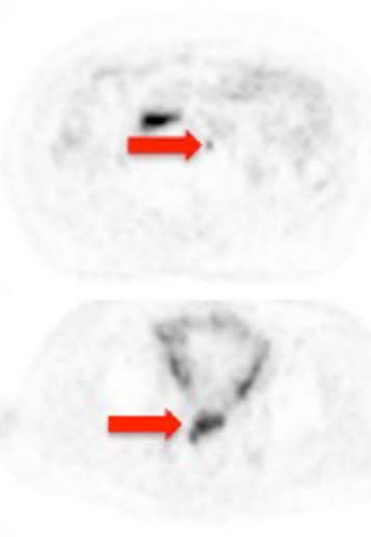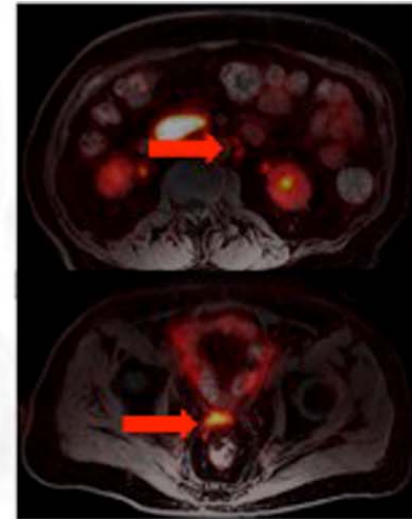

<sup>68</sup>Ga-PSMA

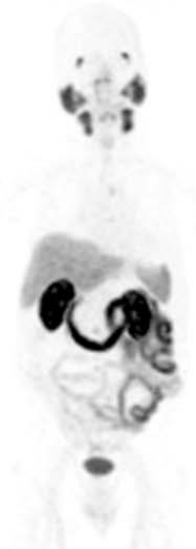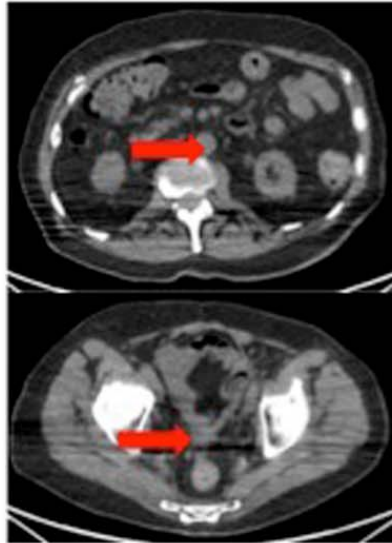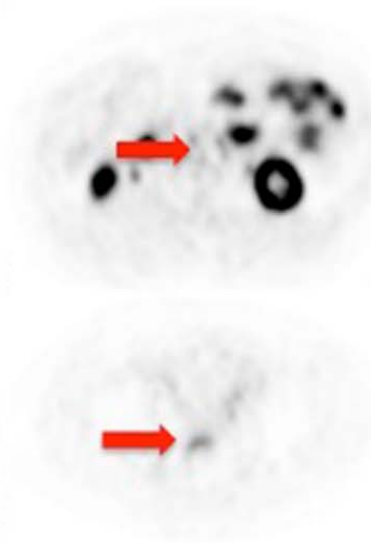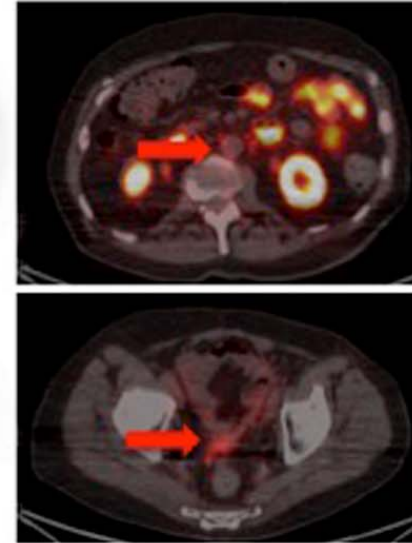

**Supplemental Figure 1:** 75-year-old man with history of Gleason 4 + 5 prostate cancer, treated with prostatectomy, radiation therapy, and androgen deprivation therapy, presenting with PSA of 36.4 and noncontributory conventional imaging. MIP images of <sup>68</sup>Ga-RM2 and <sup>68</sup>Ga-PSMA, as well as axial PET, show focal uptake corresponding to subcentimeter lymph nodes and a pelvic soft-tissue mass on MRI and CT, respectively.

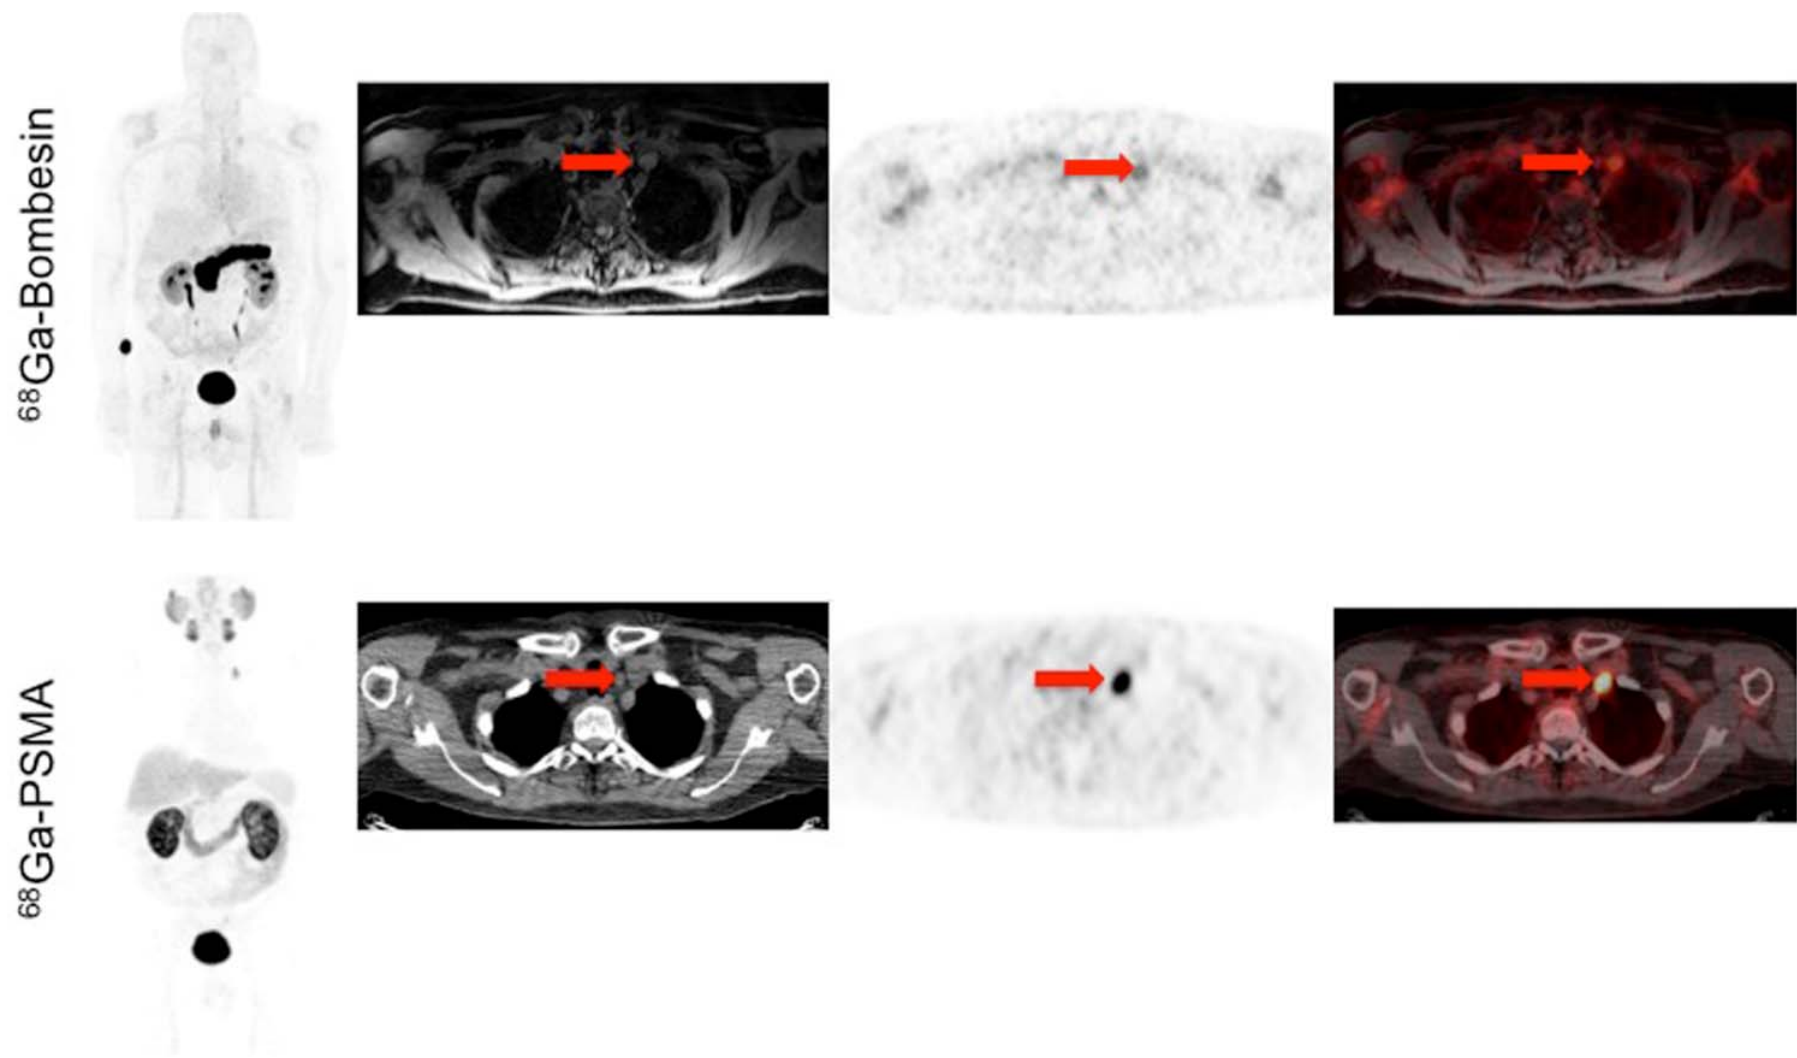

**Supplemental Figure 2:** 72-year-old man with history of Gleason 4 + 3 prostate cancer, treated with radiation therapy and androgen blockade, presenting with PSA of 8.5 and noncontributory conventional imaging. MIP images of  $^{68}\text{Ga}$ -RM2 and  $^{68}\text{Ga}$ -PSMA, as well as axial PET, show focal uptake corresponding to a left supraclavicular lymph node on MRI and CT, respectively.
